# Supplementary material
Source: Research Square preprint supplement (doi:10.21203/rs.3.rs-9881101/v1)
Supplement: Supplementary file 1 [file 0d812eee98f1b828a81610b8.pdf]

## Pairwise $p$ -values in dendrite OI

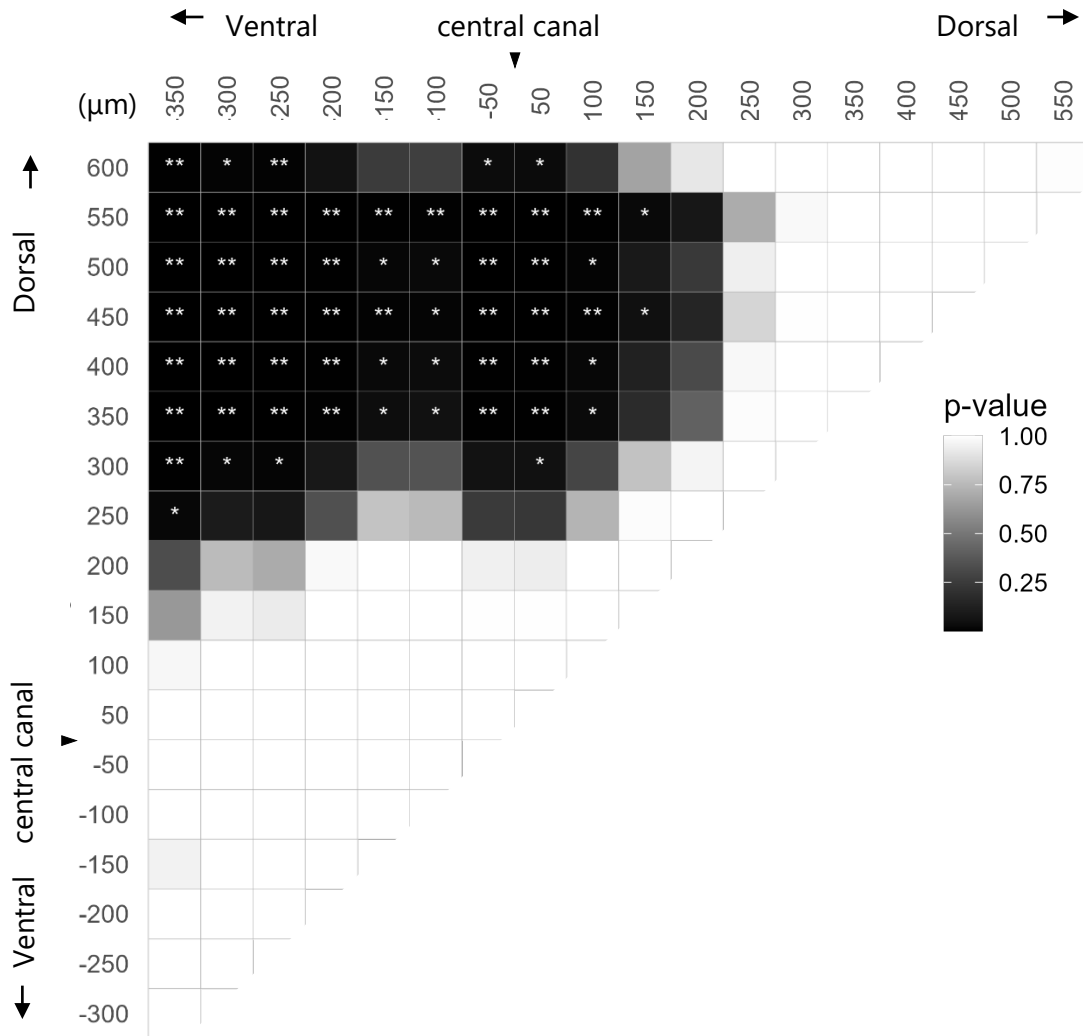

Supplementary Fig. 1.

Grayscale heatmaps showing pairwise  $p$ -values in orientation index for dendrites from Tukey's multiple comparisons across dorsoventral positions. Asterisks indicate significance levels (\*  $p < 0.05$ , \*\*  $p < 0.01$ ).

Supplementary Table S1. Experimental animals

| Animal ID |        | Age at perfusion | \$Injection area and coordinates for injection of AAV-EYFP | \$Injection area and coordinates for injection of AAV-mCherry | Fig.               |
|-----------|--------|------------------|------------------------------------------------------------|---------------------------------------------------------------|--------------------|
| *L419a1   | Male   | P76              | S1 (-0.4, 2.2, 0.8)                                        | M1 (+0.3, 1.2, 0.8)                                           | Fig. 1, 5 and 6    |
| *L419a2   | Male   | P76              | S1 (-0.4, 2.2, 0.8)                                        | M1 (+0.3, 1.2, 0.8)                                           | Fig. 4, 5 and 6    |
| *L419a3   | Female | P76              | S1 (-0.4, 2.2, 0.8)                                        | M1 (+0.3, 1.2, 0.8)                                           | Fig. 2, 3, 5 and 6 |
| *L420a1   | Male   | P78              | S1 (-1.3, 2.1, 0.7)                                        | M1 (+0.3, 1.2, 0.8)                                           | Fig. 5-8           |
| *L420a4   | Male   | P78              | S1 (-0.4, 2.2, 0.8)                                        | M1 (+0.3, 1.2, 0.8)                                           | Fig. 5, 6 and 8    |
| †F018     | Male   | P80              | S1 (-0.5, 2.5, 0.8)                                        | -                                                             | Fig. 5-6           |
| †F012     | Male   | P79              | M1 (+0.3, 1.2, 0.8)                                        | -                                                             | Fig. 5-6           |
| †F014     | Male   | P79              | M1 (+0.3, 1.2, 0.8)                                        | -                                                             | Fig. 5-6           |
| #L420a3   | Male   | P78              | S1 (-0.4, 2.2, 0.8)                                        | S1 (-1.3, 2.1, 0.7)                                           | Fig. 8             |

\$Parentheses indicate rostrocaudal and mediolateral coordinates (mm) from bregma and depth from the dura surface (mm).

\*Animals received AAVs in both S1 and M1 cortices.

†Animals received AAV in either S1 or M1 cortex

#Animal received AAVs in two different locations within the S1 cortex.

## Supplementary Table S2.

### Landmarks on the outline of the spinal gray matter used for registration

| Point number          | Side  | Description                                                                  |
|-----------------------|-------|------------------------------------------------------------------------------|
| <b>Magenta points</b> |       |                                                                              |
| 1                     |       | Ventralmost point of the dorsal funiculus                                    |
| 2                     |       | Dorsalmost point of the ventral funiculus                                    |
| 3                     | Right | Mediodorsal extremity of the dorsal horn                                     |
| 4                     | Left  | Mediodorsal extremity of the dorsal horn                                     |
| 5                     | Right | Lateralmost point of the dorsal horn                                         |
| 6                     | Left  | Lateralmost point of the dorsal horn                                         |
| 7                     | Right | Ventrolateral point of lamina V                                              |
| 8                     | Left  | Ventrolateral point of lamina V                                              |
| 9                     | Right | Ventromedial extremity of the axial motor neuron pool                        |
| 10                    | Left  | Ventromedial extremity of the axial motor neuron pool                        |
| 11                    | Right | Center of the forelimb motor neuron pool                                     |
| 12                    | Left  | Center of the forelimb motor neuron pool                                     |
| 13                    | Right | Ventralmost point of the ventral horn                                        |
| 14                    | Left  | Ventralmost point of the ventral horn                                        |
| <b>Cyan points</b>    |       |                                                                              |
| 15                    | Right | Point at one-third of the mediolateral distance from point 3 toward point 5  |
| 16                    | Left  | Point at one-third of the mediolateral distance from point 4 toward point 6  |
| 17                    | Right | Point at two-thirds of the mediolateral distance from point 3 toward point 5 |
| 18                    | Left  | Point at two-thirds of the mediolateral distance from point 4 toward point 6 |
| 19                    | Right | Point at one-third of the dorsoventral distance from point 1 toward point 3  |

|    |       |                                                                                           |
|----|-------|-------------------------------------------------------------------------------------------|
| 20 | Left  | Point at one-third of the dorsoventral distance from point 1 toward point 4               |
| 21 | Right | Point at two-thirds of the dorsoventral distance from point 1 toward point 3              |
| 22 | Left  | Point at two-thirds of the dorsoventral distance from point 1 toward point 4              |
| 23 | Right | Point at one-third of the dorsoventral distance from point 7 toward point 11              |
| 24 | Left  | Point at one-third of the dorsoventral distance from point 8 toward point 12              |
| 25 | Right | Point at two-thirds of the dorsoventral distance from point 7 toward point 11             |
| 26 | Left  | Point at two-thirds of the dorsoventral distance from point 8 toward point 12             |
| 27 | Right | Point at one-third of the dorsoventral distance from point 2 toward point 9               |
| 28 | Left  | Point at one-third of the dorsoventral distance from point 2 toward point 10              |
| 29 | Right | Point at two-thirds of the dorsoventral distance from point 2 toward point 9              |
| 30 | Left  | Point at two-thirds of the dorsoventral distance from point 2 toward point 10             |
| 31 | Right | Point at the ventral boundary of the dorsal horn and aligned mediolaterally with point 15 |
| 32 | Left  | Point at the ventral boundary of the dorsal horn and aligned mediolaterally with point 16 |
| 33 | Right | Point at one-third of the mediolateral distance from point 13 toward point 9              |
| 34 | Left  | Point at one-third of the mediolateral distance from point 14 toward point 10             |
| 35 | Right | Point at two-thirds of the mediolateral distance from point 13 toward point 9             |
| 36 | Left  | Point at two-thirds of the mediolateral distance from point 14 toward point 10            |

|    |       |                                                                                |
|----|-------|--------------------------------------------------------------------------------|
| 37 | Right | Point at one-third of the mediolateral distance from point 11 toward point 13  |
| 38 | Left  | Point at one-third of the mediolateral distance from point 12 toward point 14  |
| 39 | Right | Point at two-thirds of the mediolateral distance from point 11 toward point 13 |
| 40 | Left  | Point at two-thirds of the mediolateral distance from point 12 toward point 14 |

---

All landmarks were defined on the outline of the spinal gray matter. Blank entries in the “Side” column indicate midline landmarks.
